# Supplementary material for: The methanol sensor Wsc1 and MAPK Mpk1 suppress degradation of methanol-induced peroxisomes in methylotrophic yeast
Source: Oxford University Press journal article supplement (doi:10.1242/jcs.254714), 2021-03-26
Supplement: jcs254714supp.pdf [file jcs254714supp.pdf]

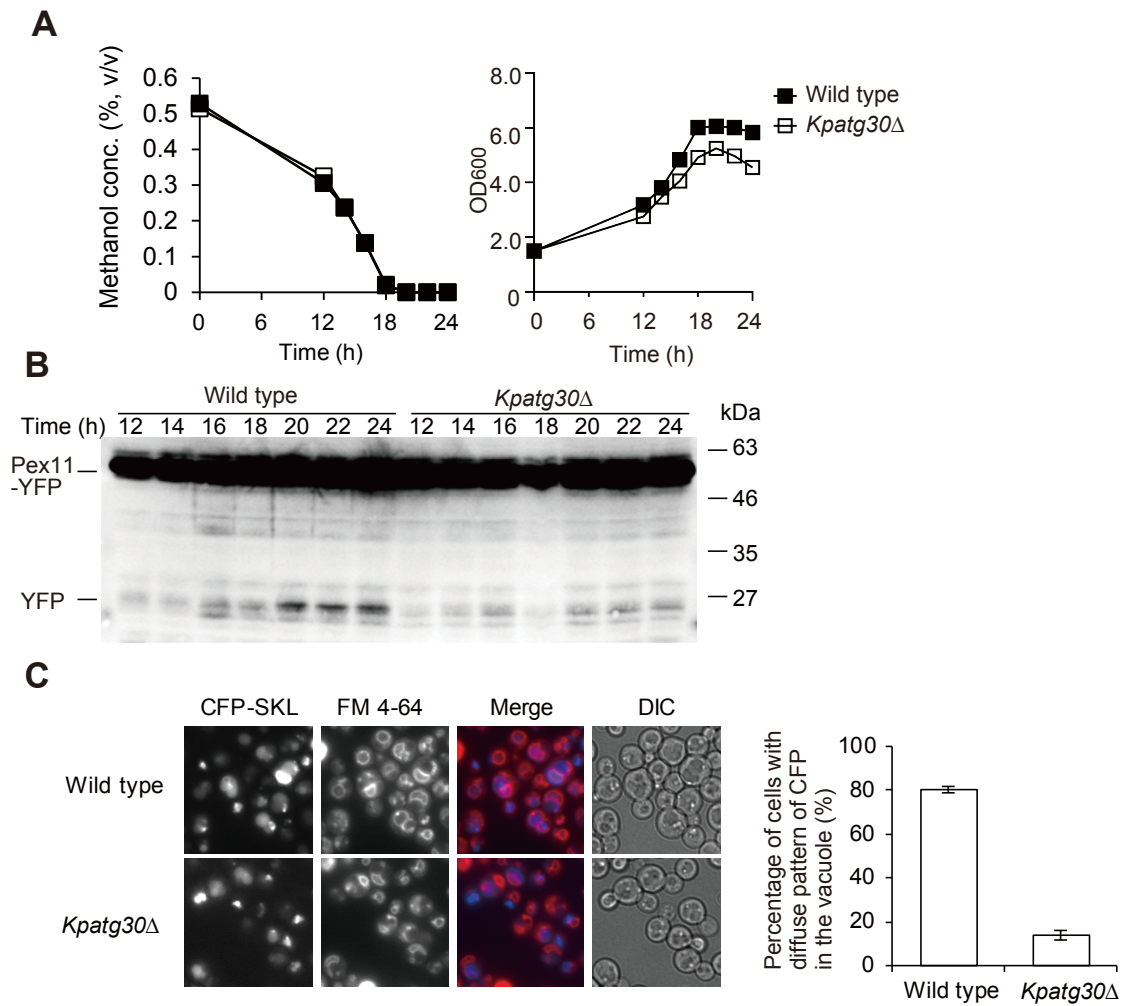

**Fig. S1. Atg30-dependent pexophagy during methanol-consumption in batch-cultured growth.** (A) Kinetics of methanol consumption (left) and growth of the wild-type and *Kpatg30*Δ strains (right) in 2 chambers of the *Beppu* flask. (B) Immunoblot analysis of KpPex11-YFP expressed in the wild-type and *Kpatg30*Δ strains. (C) Fluorescence microscopy of the wild-type and *Kpatg30*Δ cells with CFP-labeled peroxisomes (CFP-SKL) and FM4-64 -stained vacuolar membranes cultured on methanol-medium for 20 h in a *Beppu* flask. Brightfield images are shown as DIC. The graph shows the results of morphometric assays counting the percentage of the cells with CFP-SKL signal diffused in vacuole.

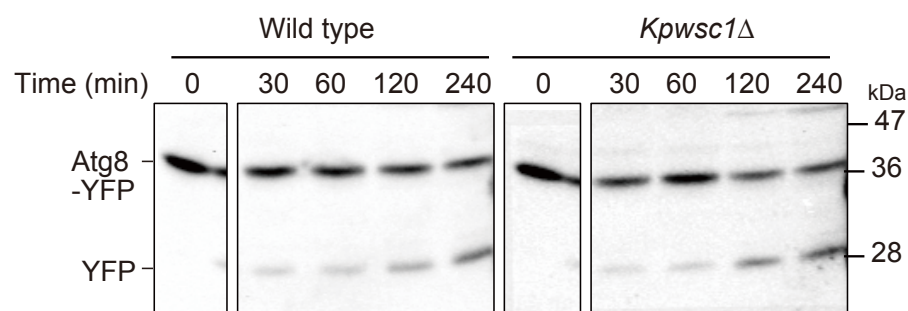

**Fig. S2. Macropexophagy in *Kpwsc1Δ* strain.** Immunoblot analysis of the lysates from the wild-type and *Kpwsc1Δ* strain expressing KpAtg8-YFP. The timepoints of sample acquisition after the shift from methanol medium to ethanol medium to induce macropexophagy are indicated. KpAtg8-YFP and cleavage YFP were detected using anti-GFP antibody.

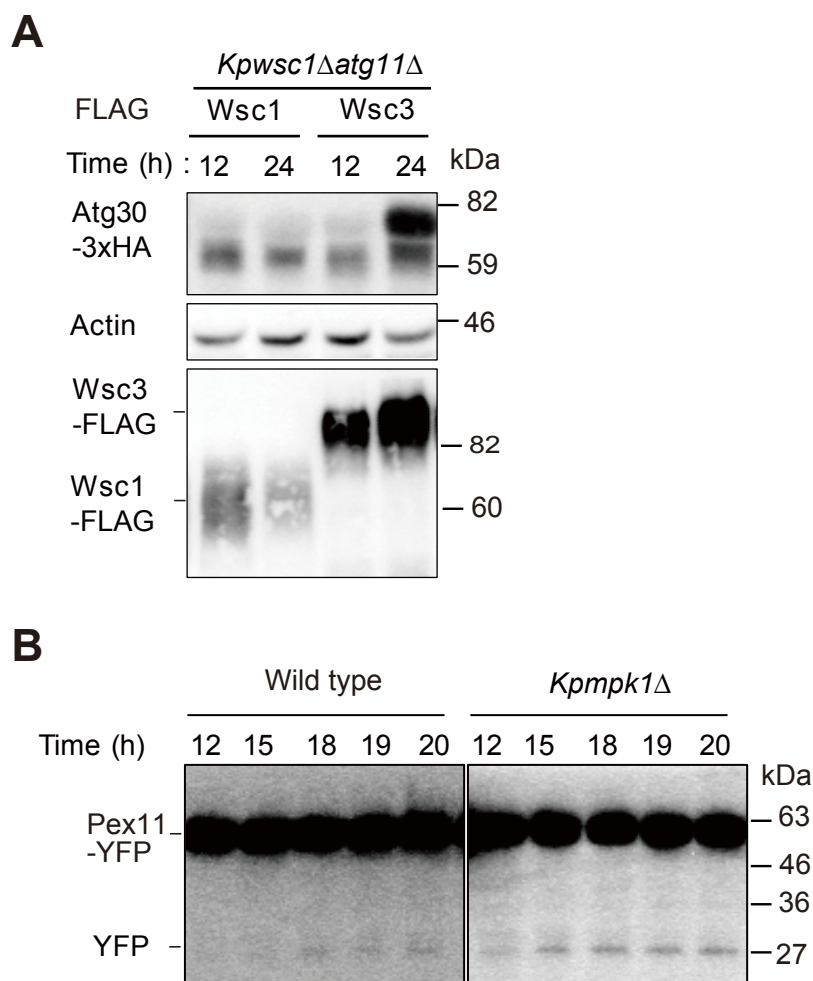

**Fig. S3. Expression of KpWsc1-FLAG and KpWsc3-FLAG in *Kpwsc1Δatg11Δ* strain, and pexophagy in *Kpmpk1Δ* strain.** (A) Immunoblot analysis of the lysates from the *Kpwsc1Δatg11Δ* strain expressing either KpWsc1-FLAG (KpWsc1) or KpWsc3-FLAG (KpWsc3). The timepoints of sample acquisition after the start of methanol culture are indicated. KpWsc1-FLAG and KpWsc3-FLAG bands were detected using anti-FLAG antibody reactive to FLAG. (B) Immunoblot analysis of Pex11-YFP expressed in the wild-type and *Kpmpk1Δ* strains cultured in a *Beppu* flask, as described in legend to Fig. 1.

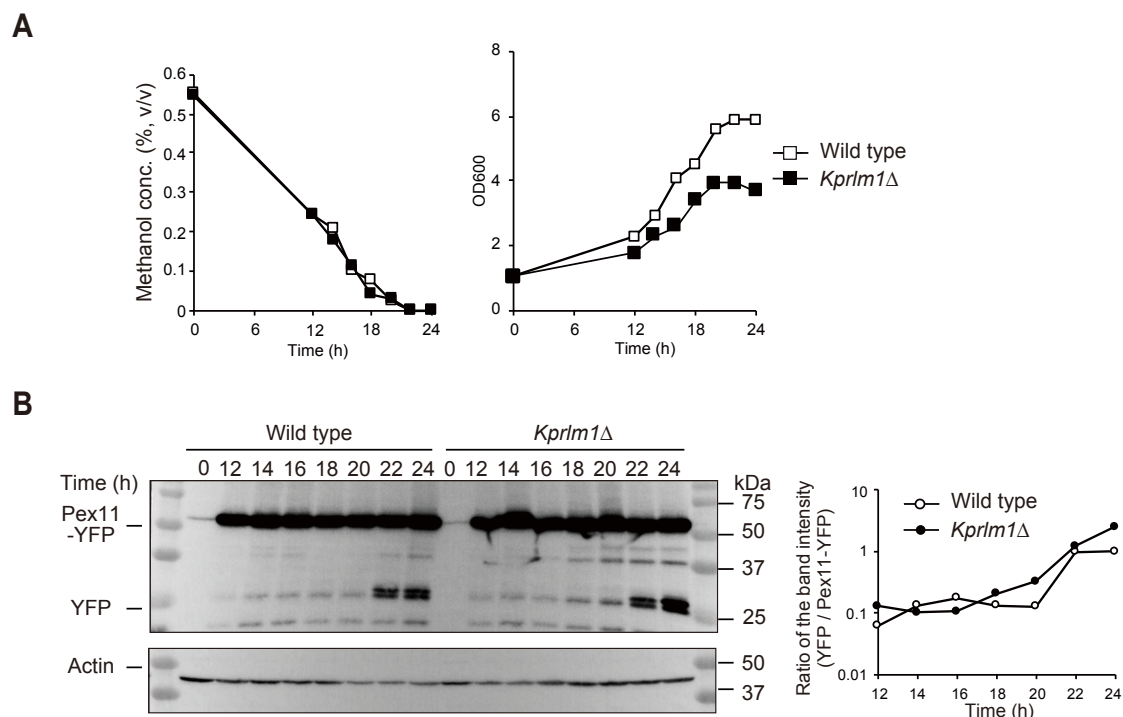

**Fig. S4. Onset of pexophagy in the *rlm1*Δ strain during batch culture on methanol in a *Beppu* flask.** (A) Kinetics of methanol consumption (left) and growth of the wild-type and *Kprlm1*Δ strains (right) in 2 chambers of the *Beppu* flask. (B) (Left panel) Immunoblot analysis of KpPex11-YFP expressed in the wild-type and *Kprlm1*Δ strains. (Right panel) Quantitative analysis of YFP-band intensity relative to KpPex11-YFP band intensity.

**Table S1. Yeast strains used in this study**

| Strain  | Genotype                                                                 | Reference                      |
|---------|--------------------------------------------------------------------------|--------------------------------|
| PPY12   | <i>Kparg4 Kphis4</i> (parental strain)                                   | Sakai <i>et al.</i> (1998)     |
| GS115   | <i>Kphis4</i>                                                            | Cregg <i>et al.</i> (1985)     |
| OH2002  | GS115, <i>Kphis4::</i> ( $P_{KpACT1}KpATG30$ -3xHA)                      | This study                     |
| IS20000 | PPY12, $P_{Pex11}KpPex11$ -YFP:: <i>KpARG4</i>                           | This study                     |
| IS20009 | IS20000, <i>Kphis4::KpHIS4</i> $P_{KpPEX11}KpPEX11$ -YFP:: <i>KpARG4</i> | This study                     |
| IS20010 | IS20009, <i>Kpatg30::Zeo<sup>r</sup></i>                                 | This study                     |
| IS20011 | IS20009, <i>Kpwsc1::Zeo<sup>r</sup></i>                                  | This study                     |
| IS20012 | IS20009, <i>Pprlm1::Zeor</i>                                             | This study                     |
| IS10020 | GS115, $P_{KpAOX1}CFP$ -SKL:: <i>KpHIS4</i>                              | This study                     |
| IS17020 | IS10020, <i>Kpatg30::BSD</i>                                             | This study                     |
| IS20110 | PPY12, <i>Kpatg11::BSD</i> , $P_{KpATG30}KpATG30$ -3xHA:: <i>KpHIS4</i>  | This study                     |
| IS20111 | IS20110, <i>Kparg4::KpARG4</i>                                           | This study                     |
| IS24110 | IS20110, <i>Kpwsc1::Zeo<sup>r</sup></i>                                  | This study                     |
| IS24111 | IS24110, <i>Kparg4::KpARG4</i>                                           | This study                     |
| IS24112 | IS24110, $P_{KpACT1}KpWSC1$ -5xFLAG:: <i>KpARG4</i>                      | This study                     |
| IS24113 | IS24110, $P_{KpACT1}KpWSC1(310-316\Delta)$ -5xFLAG:: <i>KpARG4</i>       | This study                     |
| IS24116 | IS24110, $P_{KpACT1}KpWSC1(Y53A)$ -5xFLAG:: <i>KpARG4</i>                | This study                     |
| IS24117 | IS24110, $P_{KpACT1}KpWSC1(Y53F)$ -5xFLAG:: <i>KpARG4</i>                | This study                     |
| IS22110 | IS20110, <i>Kmpk1::Zeo<sup>r</sup></i>                                   | This study                     |
| IS22111 | IS22110, <i>Kparg4::KpARG4</i>                                           | This study                     |
| IS22112 | IS22110, $P_{KpMPK1}KpMPK1$ -YFP:: <i>KpARG4</i>                         | This study                     |
| IS22113 | IS22110, $P_{KpMPK1}KpMPK1(TAYF)$ -YFP:: <i>KpARG4</i>                   | This study                     |
| IS23110 | IS20110, <i>Kprlm1::Zeo<sup>r</sup></i>                                  | This study                     |
| IS23111 | IS23110, <i>Kparg4::KpARG4</i>                                           | This study                     |
| IS23116 | IS20110, <i>Kpswi4::Zeo<sup>r</sup></i>                                  | This study                     |
| IS23117 | IS23116, <i>Kparg4::KpARG4</i>                                           | This study                     |
| IS23118 | IS20110, <i>Kpmsg5::Zeo<sup>r</sup></i>                                  | This study                     |
| IS23119 | IS23118, <i>Kparg4::KpARG4</i>                                           | This study                     |
| IS23120 | IS20110, <i>Kpptp2a::Zeo<sup>r</sup></i>                                 | This study                     |
| IS23121 | IS23120, <i>Kparg4::KpARG4</i>                                           | This study                     |
| IS23122 | IS23120, <i>Kpmsg5::KpARG4</i>                                           | This study                     |
| IS24118 | IS24110, $P_{KpACT1}KpWSC3$ -5xFLAG:: <i>KpARG4</i>                      | This study                     |
| SA1017  | PPY12, <i>arg4::pSAP115(PATG8YFP-PpATG8, ARG4)</i>                       | Mukaiyama <i>et al.</i> (2004) |
| IS24119 | SA1017, <i>his4::HIS4</i>                                                | This study                     |
| IS24120 | SA1017, <i>Ppwsc1::Zeor</i>                                              | This study                     |
| IS24121 | IS24120, <i>his4::HIS4</i>                                               | This study                     |

**Table S2. Plasmids used in this study**

| Designation         | Description                                             | Reference                   |
|---------------------|---------------------------------------------------------|-----------------------------|
| pIB1                | <i>KpHIS4</i>                                           | Sears <i>et al.</i> (1998)  |
| SK+Zeo <sup>r</sup> | Zeo <sup>r</sup>                                        | Yano <i>et al.</i> (2009)   |
| pOH100              | $\Delta KpWSC1::Zeo^r$                                  | Ohsawa <i>et al.</i> (2017) |
| pOH103              | $\Delta Kprlm1::Zeo^r$                                  | This study                  |
| pOH104              | $\Delta Kpatg30::Bsd^r$                                 | This study                  |
| pOH105              | $\Delta Kpatg30::Zeo^r$                                 | This study                  |
| pOH106              | $\Delta Kpswi4::Zeo^r$                                  | This study                  |
| pOH107              | $\Delta Kpmsg5\Delta::Zeo^r$                            | This study                  |
| pOH108              | $\Delta Kpptp2a\Delta::Zeo^r$                           | This study                  |
| pOH109              | $\Delta Kpmsg5\Delta::ScARG4$                           | This study                  |
| pIS100              | $\Delta Kpatg11::Bsd^r$                                 | This study                  |
| pIS101              | $\Delta Kpmpk1::Zeo^r$                                  | This study                  |
|                     |                                                         | Laboratory                  |
| pSY302              | <i>P<sub>KpPEX11</sub>KpPEX11-YFP KpARG4</i>            | collection                  |
| pSY8200             | pIB1 <i>KpHIS4::ScARG4</i>                              | Ohsawa <i>et al.</i> (2017) |
| pSY006              | pIB1 3xHA <i>KpHIS4</i>                                 | Ohsawa <i>et al.</i> (2017) |
| pRN001              | <i>P<sub>KpATG30</sub>KpATG30-3xHA KpHIS4</i>           | This study                  |
| pYA006              | <i>P<sub>KpAOX1</sub>CFP-SKL KpHIS4</i>                 | Ano <i>et al.</i> (2005)    |
| pOH202              | <i>P<sub>KpACT1</sub>KpWSC1-3xHA KpHIS4</i>             | Ohsawa <i>et al.</i> (2017) |
| pOH203              | <i>P<sub>KpACT1</sub>KpWSC3-3xHA KpHIS4</i>             | Ohsawa <i>et al.</i> (2017) |
| pOH205              | <i>P<sub>KpACT1</sub>KpWSC1(310-316Δ)-3xHA KpHIS4</i>   | Ohsawa <i>et al.</i> (2017) |
| pOH208              | <i>P<sub>KpACT1</sub>KpWSC1(Y53A)-3xHA KpHIS4</i>       | Ohsawa <i>et al.</i> (2017) |
| pOH209              | <i>P<sub>KpACT1</sub>KpWSC1(Y53F)-3xHA KpHIS4</i>       | Ohsawa <i>et al.</i> (2017) |
| pNT206              | pIB1 5xFLAG <i>KpARG4</i>                               | Tamura <i>et al.</i> (2013) |
| pOH213              | <i>P<sub>KpACT1</sub>KpWSC1-5xFLAG KpARG4</i>           | This study                  |
| pOH214              | <i>P<sub>KpACT1</sub>KpWSC1(310-316Δ)-5xFLAG KpARG4</i> | This study                  |
| pOH215              | <i>P<sub>KpACT1</sub>KpWSC1(Y53A)-5xFLAG KpARG4</i>     | This study                  |
| pOH216              | <i>P<sub>KpACT1</sub>KpWSC1(Y53F)-5xFLAG KpARG4</i>     | This study                  |
| pOH217              | <i>P<sub>KpACT1</sub>KpWSC3-5xFLAG KpARG4</i>           | This study                  |
| pNT204              | pIB1 <i>KpARG4</i>                                      | Tamura <i>et al.</i> (2010) |
| pNT205              | YFP-pIB1 <i>KpARG4</i>                                  | Tamura <i>et al.</i> (2010) |
| pIS001              | <i>P<sub>KpMPK1</sub>KpMPK1-YFP KpARG4</i>              | This study                  |
| pIS002              | <i>P<sub>KpMPK1</sub>KpMPK1(TAYF)-YFP KpARG4</i>        | This study                  |

**Table S3. Primers used in this study**

| Designation         | DNA Sequence                                             |
|---------------------|----------------------------------------------------------|
| PpATG11-BSD-F       | 5'-GGATCTCAACAACTGCGGTAGCCCACACACCATAGCTTC-3'            |
| PpATG11-BSD-R       | 5'-CAGTCCATCGATCTCCGTTTTTGTAAATAGAACAAGAAAAATGAAACTGA-3' |
| EcoRI-PpATG11-1-F   | 5'-CGGAATTCAACGCAACACAAGTCCTTCC-3'                       |
| PpATG11-1-R         | 5'-GAAGCTATGGTGTGTGGGCTACCGCAGTTTGTGAGATCC-3'            |
| PpATG11-2-F         | 5'-TCAGTTTCATTTTTCTTGTCTATTACAAAACGGAGATCGATGGACTG-3'    |
| BamHI-PpATG11-2-R   | 5'-CGGGATCCGGAGACGACACCACATTGAA-3'                       |
| HindIII-PpATG30-1-F | 5'-CCCAAGCTTTGCCATTTAGCTCCCTGATT-3'                      |
| PpATG30-1-R         | 5'-GAAGCTATGGTGTGTGGGCTATATTCTTGCTCGGCATCGT-3'           |
| PpATG30-2-F         | 5'-CGAAGGCTTTAATTTGCAAGCTCCAATCCCAGTCCACATCT-3'          |
| PstI-PpATG30-2-R    | 5'-TGCACTGCAGTGCCAAGTCTGACTCCCTTT-3'                     |
| PpATG30-BSD-F       | 5'-ACGATGCCGAGCAAGAATATAGCCCACACACCATAGCTTC-3'           |
| PpATG30-BSD-R       | 5'-AGATGTGGACTGGGAATTGGAGCTTGCAAATTAAGCCTTCG-3'          |
| NotI-PpMPK1-1-F     | 5'-CGATTATTTCTTCGGTGCCTGCGGCCGCCCTGAAGAGGGGAAAGAAGG-3'   |
| KpnI-PpMPK1-1-R     | 5'-GGGGTACCCACCTTTTTGATGGCCACTT-3'                       |
| SacI-PpMPK1-2-F     | 5'-CCCGAGCTCCGGATTGGATCGGTATGGTA-3'                      |
| NotI-PpMPK1-2-R     | 5'-CCTTCTTTCCCCTCTTCAGGGCGGCCGACGCCACCGAAGAAATAATCG-3'   |
| NotI-PpRLM1-1-F     | 5'-ATTGCCAGAAAGCAACGTCTGCGGCCGCAACTCATCAGGCGTGCTTTT-3'   |
| KpnI-PpRLM1-1-R     | 5'-GGGGTACCAAAGCCCAGCTTTCCTCTTC-3'                       |
| SacI-PpRLM1-2-F     | 5'-CCCGAGCTCCGAGATTTCCAAGCAGTGTG-3'                      |
| NotI-PpRLM1-2-R     | 5'-AAAAGCACGCCTGATGAGTTGCGGCCGACGACGTTGCTTTCTGGCAAT-3'   |
| NotI-PpSWI4-1-F     | 5'-GAGTGGACGTCAGCATTTTCAGCGGCCGCGGAGCATCGAGTGTGTTGTG-3'  |
| KpnI-PpSWI4-1-R     | 5'-GGGGTACCACCTCCTTGGATCCTCTGGT-3'                       |
| SacI-PpSWI4-2-F     | 5'-CCCGAGCTCCGCATGAAGCTGGTAAATGA-3'                      |
| NotI-PpSWI4-2-R     | 5'-CACAACACACTCGATGCTCCGCGGCCGCTGAAATGCTGACGTCCACTC-3'   |
| PpMSG5-1-F          | 5'-GACCAAAGACGTGGGAAGAA-3'                               |
| PpMSG5-1-R          | 5'-TTTGAAGCTATGGTGTGTGGGCGGTTCTTCTTCGAAACCTG-3'          |
| PpMSG5-2-F          | 5'-CGAAGGCTTTAATTTGCAAGCTATCAGCCTACCTGCATCACC-3'         |
| PpMSG5-2-R          | 5'-TACGTTTGGCATCTGGAGTG-3'                               |
| PpMSG5-ZEO-F        | 5'-CAGGTTTCGAAGAAGAACCGCCCACACACCATAGCTTCAAA-3'          |
| PpMSG5-ZEO-R        | 5'-GGTGATGCAGGTAGGCTGATAGCTTGCAAATTAAGCCTTCG-3'          |
| PpPTP2A-1-F         | 5'-GTTTGGGGGCTACAACCTTGA-3'                              |
| PpPTP2A-1-R         | 5'-TTTGAAGCTATGGTGTGTGGGCGAGATTCCTCGTACGCATT-3'          |
| PpPTP2A-2-F         | 5'-CGAAGGCTTTAATTTGCAAGCTCGAAGACTCAGGGTATCAATGG-3'       |
| PpPTP2A-2-R         | 5'-TCTTCGCTGTTTCGTCTACCC-3'                              |

|                            |                                                            |
|----------------------------|------------------------------------------------------------|
| PpPTP2A-ZEO-F              | 5'-AATGCGTACGAGGAATCTCGCCCACACACCATAGCTTCAAA-3'            |
| PpPTP2A-ZEO-R              | 5'-CCATTGATACCCTGAGTCTTCGAGCTTGCAAATTAAGCCTTCG-3'          |
| (PpMSG5)-ScARG4-F          | 5'-CAGGTTTCGAAGAAGAACCGGATCTGCCAAGGCTCCATCA-3'             |
| (PpMSG5)-ScARG4-R          | 5'-GGTGATGCAGGTAGGCTGATTATAAACTAAGACAAGTCTAAGTTGGTTAAC-3'  |
| (ScArg4)-PpMSG5-1-R        | 5'-TGATGGAGCCTTGGCAGATCCGGTTCTTCTTCGAAACCTG-3'             |
| (ScArg4)-PpMSG5-2-F        | 5'-GTTAACCAACTTAGCAGTTGTCTTAGTTTATAATCAGCCTACCTGCATCACC-3' |
| XhoI-PpATG30-subclo-F      | 5'-CCGCTCGAGGGCGATGAGAGGAAGCATT-3'                         |
| SphI-PpATG30-subclo-R      | 5'-ACATGCATGCTAAAATCTCCTGTTTGTAGCTTTGA-3'                  |
| KpnI-P <sub>ACT1</sub> -F  | 5'-GGGGTACCTCGCTGGTAATCCCGGCT-3'                           |
| SpeI-PpWSC1-subclo-R       | 5'-GGACTAGTAGCATCATCAGGATTTGCTACC-3'                       |
| SpeI-PpWSC1(310-316Δ)-R    | 5'-GGACTAGTAGCATCCACCTTCCTGGAGTAATCTGCT-3'                 |
| BamHI-P <sub>ACT1</sub> -F | 5'-CGGGATCCTCGCTGGTAATCCCGGCT-3'                           |
| SpeI-PpWSC3-R              | 5'-GGACTAGTAACTTCATCATCTGTGGGGTT-3'                        |
| XmaI-MPK1-F                | 5'-TTCCCCCGGGTTCGAGAAAACGCAAACCTCTG-3'                     |
| (YFP)-PpMPK1-R             | 5'-CATGCCTGCAGCTCGAGCTGTGTACCATACCGATCCAATC-3'             |
| (PpMPK1)-YFP-F             | 5'-GATTGGATCGGTATGGTACACAGCTCGAGCTGCAGGCATG-3'             |
| BamHI-YFP-R                | 5'-CGCGGATCCTTACTTGTACAGCTCGTCCATGC-3'                     |
| PpMPK1(T188AY190F)-F       | 5'-TTTCTTGCTGAATTTGTTGCTACCAGGTGGTAT-3'                    |
| PpMPK1(T188AY190F)-R       | 5'-AGCAACAAATTCAGCAAGAAAGCCAGCATTCTT-3'                    |
| RT-GAP1-F                  | 5'-CCACCGGTGTTTTACCACT-3'                                  |
| RT-GAP1-R                  | 5'-CACCGACAACGAACATTGGA-3'                                 |
| RT-PpMSG5-F                | 5'-ACCGATCCCGGAATACCAAG-3'                                 |
| RT-PpMSG5-R                | 5'-TCCAGTTCTGTGGCGGACTT-3'                                 |
| RT-PpPTP2A-F               | 5'-TGGCTTCTCCTGGATGTGGT-3'                                 |
| RT-PpPTP2A-R               | 5'-GGTCTTTGGCACTTGCTGCT-3'                                 |

**Table S4:** Supplementary Figure 1C cell count

[Click here to download Table S4](#)
